# Supplementary material for: Serum Myo-Inositol, Dimethyl Sulfone, and Valine in Combination with Creatinine Allow Accurate Assessment of Renal Insufficiency—A Proof of Concept
Source: Diagnostics (Basel). 2021 Feb 3;11(2):234. doi: 10.3390/diagnostics11020234 (PMC7913668; doi:10.3390/diagnostics11020234)
Supplement: Supplementary file 1 [file diagnostics-11-00234-s001.xlsx]

## Sheet: S1
Patient	mGFR	GFRNMR	eGFR Crea	Age	Sex	Set
1	83	98	93	10	M	Training Set
2	120	105	100	7	M	Training Set
3	65	104	67	9	F	Training Set
4	130	85	120	29	M	Training Set
5	92	88	101	47	F	Training Set
6	140	133	134	5	F	Training Set
7	77	81	95	24	F	Training Set
8	41	51	40	61	M	Training Set
9	77	69	102	36	M	Training Set
10	58	57	57	19	M	Training Set
11	28	24	24	45	M	Training Set
12	18	14	15	64	F	Training Set
13	94	81	91	15	M	Training Set
14	124	101	127	17	F	Training Set
15	90	121	114	11	F	Training Set
16	136	100	149	33	M	Training Set
17	82	73	78	40	M	Training Set
18	98	89	102	55	F	Training Set
19	58	64	48	55	F	Training Set
20	104	93	94	65	F	Training Set
21	123	104	94	11	M	Training Set
22	64	91	77	14	F	Training Set
23	74	63	72	61	M	Training Set
24	66	66	70	66	M	Training Set
25	81	69	55	48	M	Training Set
26	105	112	117	4	F	Training Set
27	57	58	57	66	M	Training Set
28	15	15	32	63	M	Training Set
29	58	71	64	9	F	Training Set
30	50	49	39	48	F	Training Set
31	20	24	18	71	F	Training Set
32	17	28	26	15	F	Training Set
33	79	108	90	62	M	Training Set
34	54	59	53	14	M	Training Set
35	124	113	99	6	F	Training Set
36	25	16	30	25	M	Training Set
37	14	11	29	72	M	Training Set
38	89	95	99	14	M	Training Set
39	101	118	100	4	F	Training Set
40	37	39	34	16	M	Training Set
41	124	88	119	45	M	Training Set
42	5	19	33	70	M	Training Set
43	147	123	156	8	M	Training Set
44	46	65	46	14	M	Training Set
45	71	61	63	54	M	Training Set
46	92	77	84	40	M	Training Set
47	94	77	70	15	F	Training Set
48	66	92	100	53	F	Training Set
49	52	64	55	12	M	Training Set
50	51	57	55	76	M	Training Set
51	112	109	118	16	M	Training Set
52	57	77	94	39	M	Training Set
53	100	102	96	18	F	Training Set
54	114	87	82	38	F	Training Set
55	37	36	35	13	F	Training Set
56	48	65	51	6	F	Training Set
57	69	48	70	66	M	Training Set
58	100	92	92	47	F	Training Set
59	82	84	88	64	F	Training Set
60	39	70	53	18	F	Training Set
61	51	55	71	57	F	Training Set
62	130	99	89	7	M	Training Set
63	28	32	38	65	M	Training Set
64	83	82	100	40	F	Training Set
65	96	92	118	50	F	Training Set
66	41	40	44	60	F	Training Set
67	43	72	29	47	F	Training Set
68	28	26	39	48	M	Training Set
69	105	82	82	15	M	Training Set
70	113	84	115	29	F	Training Set
71	87	88	96	17	M	Training Set
72	99	102	96	11	M	Training Set
73	64	97	78	5	M	Training Set
74	88	89	92	12	F	Training Set
75	67	86	86	18	F	Training Set
76	79	73	97	58	M	Training Set
77	123	97	193	57	M	Training Set
78	42	55	51	13	F	Training Set
79	68	91	88	14	F	Training Set
80	73	74	66	63	M	Training Set
81	65	71	161	58	M	Training Set
82	122	109	164	12	F	Training Set
83	71	59	85	24	M	Training Set
84	44	75	61	19	F	Training Set
85	83	65	60	15	M	Training Set
86	139	127	171	43	F	Training Set
87	116	88	86	34	F	Training Set
88	8	7	20	73	M	Training Set
89	30	28	34	73	F	Training Set
90	26	29	33	13	M	Training Set
91	80	76	113	35	M	Training Set
92	131	115	179	6	F	Training Set
93	94	80	117	35	M	Training Set
94	120	101	154	15	F	Training Set
95	45	68	79	64	F	Training Set
96	79	85	97	61	M	Test Set
97	103	94	126	31	M	Test Set
98	46	54	97	63	M	Test Set
99	61	45	85	50	M	Test Set
100	53	58	63	57	M	Test Set
101	86	72	97	61	M	Test Set
102	102	78	103	59	M	Test Set
103	48	55	83	61	M	Test Set
104	104	90	62	74	F	Test Set
105	95	82	103	57	M	Test Set
106	101	98	118	62	M	Test Set
107	48	41	45	71	M	Test Set
108	65	96	87	67	F	Test Set
109	60	73	72	80	F	Test Set
110	60	64	86	63	M	Test Set
111	63	73	79	80	M	Test Set
112	65	57	93	61	M	Test Set
113	53	46	98	83	M	Test Set
114	33	41	46	70	F	Test Set
115	36	43	46	69	M	Test Set
116	71	48	89	71	F	Test Set
117	67	72	96	59	F	Test Set
118	47	68	64	81	M	Test Set
119	91	80	97	66	M	Test Set
120	61	91	83	76	M	Test Set
121	73	80	99	64	F	Test Set
122	81	80	83	84	M	Test Set
123	59	92	113	48	F	Test Set
124	68	61	62	63	M	Test Set
125	40	65	93	64	F	Test Set
126	63	48	69	62	M	Test Set
127	47	62	89	72	M	Test Set
128	29	55	49	57	F	Test Set
129	84	102	105	56	M	Test Set
130	60	77	102	54	F	Test Set
131	71	70	91	63	M	Test Set
132	25	33	61	65	M	Test Set
133	60	60	63	62	F	Test Set
134	113	96	102	62	M	Test Set
135	133	101	128	45	M	Test Set
136	57	55	96	61	F	Test Set
137	44	61	47	76	F	Test Set
138	66	62	98	60	M	Test Set
139	61	59	71	73	F	Test Set
140	50	51	75	57	M	Test Set
141	60	80	81	77	M	Test Set
142	108	95	102	63	F	Test Set
143	55	54	63	73	F	Test Set
144	62	86	113	53	M	Test Set
145	67	60	74	74	F	Test Set
146	53	55	80	78	M	Test Set
147	72	71	74	72	F	Test Set
148	40	37	76	57	M	Test Set
149	61	68	88	78	F	Test Set
150	69	70	92	63	M	Test Set
151	55	67	93	60	M	Test Set
152	30	33	44	87	F	Test Set
153	68	68	85	74	F	Test Set
154	56	62	60	66	M	Test Set
155	70	66	82	75	M	Test Set
156	93	91	98	66	F	Test Set
157	55	75	103	56	M	Test Set
158	78	74	97	61	F	Test Set
159	47	64	99	65	M	Test Set
160	74	62	99	57	M	Test Set
161	63	64	56	63	M	Test Set
162	57	52	58	80	M	Test Set
163	57	57	74	80	M	Test Set
164	19	15	29	53	M	Test Set
165	65	42	74	76	F	Test Set
166	112	99	115	64	M	Test Set
167	56	87	79	88	F	Test Set
168	62	75	72	62	F	Test Set
169	99	98	120	55	F	Test Set
170	32	26	57	59	M	Test Set
171	70	50	89	70	F	Test Set
172	91	78	89	74	M	Test Set
173	25	23	23	79	M	Test Set
174	69	72	91	55	M	Test Set
175	72	59	76	82	F	Test Set
176	108	73	107	53	M	Test Set
177	44	41	58	84	M	Test Set
178	63	50	82	57	M	Test Set
179	73	82	87	71	F	Test Set
180	73	72	97	59	M	Test Set
181	48	39	48	68	M	Test Set
182	53	87	67	74	F	Test Set
183	77	79	106	51	M	Test Set
184	94	91	111	59	M	Test Set
185	46	55	90	58	F	Test Set
186	61	73	79	73	F	Test Set
187	79	92	128	47	M	Test Set
188	45	41	51	75	M	Test Set
189	96	71	91	55	M	Test Set
190	70	50	68	77	M	Test Set
191	76	75	67	59	M	Test Set
192	73	79	74	74	F	Test Set
193	35	20	67	46	M	Test Set
194	70	82	83	71	F	Test Set
195	99	88	106	57	M	Test Set
196	41	35	35	73	F	Test Set
197	45	43	43	72	F	Test Set
198	65	61	82	70	M	Test Set
199	47	70	48	87	F	Test Set
200	78	42	90	69	M	Test Set
201	62	57	53	63	M	Test Set
202	78	79	82	62	M	Test Set
203	74	50	92	70	F	Test Set
204	76	70	87	62	M	Test Set
205	38	41	84	48	M	Test Set
206	38	35	42	75	F	Test Set
207	100	84	85	32	F	Test Set
208	33	47	55	42	M	Test Set
209	49	51	65	65	M	Test Set
210	59	51	59	70	M	Test Set
211	103	96	92	15	F	Test Set
212	110	129	123	5	F	Test Set
213	139	112	122	29	F	Test Set
214	123	106	127	12	M	Test Set
215	21	16	19	58	M	Test Set
216	104	59	73	55	M	Test Set
217	97	98	128	53	F	Test Set
218	55	59	76	56	M	Test Set
219	46	40	44	63	M	Test Set
220	8	5	17	67	M	Test Set
221	92	119	115	18	M	Test Set
222	82	82	89	60	F	Test Set
223	29	37	40	56	M	Test Set
224	47	76	63	68	F	Test Set
225	121	93	173	40	F	Test Set
226	65	64	59	36	F	Test Set
227	80	102	74	6	M	Test Set
228	49	38	65	53	M	Test Set
229	94	85	90	44	M	Test Set
230	92	84	86	58	M	Test Set
231	26	32	32	13	F	Test Set
232	120	105	138	59	M	Test Set
233	127	106	117	37	F	Test Set
234	92	86	102	40	M	Test Set
235	86	98	236	38	M	Test Set
236	133	122	167	12	F	Test Set
237	87	79	96	23	M	Test Set
238	48	47	76	53	M	Test Set
239	22	28	55	63	M	Test Set
240	70	60	50	17	M	Test Set
241	43	45	37	46	F	Test Set
242	145	110	112	10	M	Test Set
243	92	76	160	69	F	Test Set
244	73	91	101	12	M	Test Set
245	105	92	93	18	M	Test Set
246	33	40	32	57	M	Test Set
247	74	57	58	48	M	Test Set
248	79	71	64	50	M	Test Set
249	113	98	140	28	M	Test Set
250	75	65	67	59	F	Test Set
251	139	105	138	9	F	Test Set
252	144	97	186	41	M	Test Set
253	178	132	248	4	F	Test Set
254	173	111	92	7	F	Test Set
255	16	15	28	58	M	Test Set
256	85	116	137	12	F	Test Set
257	135	125	191	3	F	Test Set
258	110	130	129	7	M	Test Set
259	51	69	67	17	F	Test Set
260	57	65	55	14	M	Test Set
261	60	67	76	19	F	Test Set
262	43	59	54	11	F	Test Set
263	52	45	56	14	F	Test Set
264	47	52	54	16	F	Test Set
265	65	65	66	16	M	Test Set
266	20	14	21	15	F	Test Set
267	48	49	54	16	M	Test Set
268	68	71	81	21	F	Test Set
269	73	89	104	6	M	Test Set
270	14	2	8	15	M	Test Set
271	48	59	60	11	F	Test Set
272	106	112	133	13	F	Test Set
273	129	117	106	8	M	Test Set
274	91	119	137	4	F	Test Set
275	74	82	77	16	M	Test Set
276	59	77	64	16	F	Test Set
277	49	64	59	14	M	Test Set
278	133	106	270	5	F	Test Set
279	96	136	133	4	M	Test Set
280	134	146	173	6	M	Test Set
281	40	31	38	16	M	Test Set
282	123	104	103	6	F	Test Set
283	71	63	65	46	M	Test Set
284	49	85	57	73	F	Test Set
